# Supplementary material for: Different Effects of BORIS/CTCFL on Stemness Gene Expression, Sphere Formation and Cell Survival in Epithelial Cancer Stem Cells
Source: PubMed Central journal article supplement (PMC4506091; doi:10.1371/journal.pone.0132977), 2015-07-17
Supplement: pone.0132977.s001.pdf [file pone.0132977.s001.pdf]

| <b>Gene</b> | <b>Forward primer</b>          | <b>Reverse primer</b>            |
|-------------|--------------------------------|----------------------------------|
| ECADH       | 5' TGAAATTGGAAATTTTATTGATGA 3' | 5' ATCATAAGGCGGGGCTGT 3'         |
| CK19        | 5' CTGCAGATGACTTCCGAACC 3'     | 5' TTGATGTCGGCCTCCAC 3'          |
| EpCAM       | 5' GCAGCTCAGGAAGAATGTGTC 3'    | 5' GACGATTATTATTCACAAAGCAGTTT 3' |
| NCADH       | 5' CCTGAAGCCAACCTTAACTGA 3'    | 5' TCTTGGGAACACTATTTCTTCAA 3'    |
| VIMENTIN    | 5' CAAAGTGGAATCTTTGCAAGAAG 3'  | 5' GCAGCTCCTGGATTTCTCT 3'        |
| FIBRONECTIN | 5' TAAGCTGTACCATCGCAAACC 3'    | 5' CCTCCAGGTGTCACCAATCT 3'       |
| SNAIL       | 5' CCCAATCGGAAGCCTAACTA 3'     | 5' TAGGGCTGCTGGAAGGTAAA 3'       |
| SLUG        | 5' CAGACCCTGGTTGCTTCAA 3'      | 5' GCAGTGAGGGCAAGAAAAAG 3'       |
| TWIST       | 5' CAGCAGGGCCGGAGAC 3'         | 5' CCAGAGTCTCTAGACTGTCCATTTT 3'  |
